# Supplementary material
Source: publisher site journal article supplement (https://www.dovepress.com/article/371653)
Supplement: Supplementary file 1 [file get_supplementary_file.php]

**Appendices**

**The Physical Courage at Work Scale**

**There are many risks that could be involved in workplace interactions. These risks could range from minor to severe, depending on the behavior. For the following, please rate your agreement that you would perform the following behaviors despite the risks involved. Also, some of these behaviors refer to being currently employed.**

| **Number** | **Item** | **extremely disagreement** |  |  |  |  |  | **extremely agreement** |
| --- | --- | --- | --- | --- | --- | --- | --- | --- |
| 1 | Even if I thought a job had a high risk of injury, I would work it to contribute to society | 1 | 2 | 3 | 4 | 5 | 6 | 7 |
| 2 | I would work a job with a high chance of health problems to help my community | 1 | 2 | 3 | 4 | 5 | 6 | 7 |
| 3 | To contribute to society, I would work a job with a high rate of major injury | 1 | 2 | 3 | 4 | 5 | 6 | 7 |
| 4 | If I thought it was the best for my company, I would do a dangerous work assignment | 1 | 2 | 3 | 4 | 5 | 6 | 7 |
| 5 | Even if it would cause severe long-term health problems, I would take a job to help others | 1 | 2 | 3 | 4 | 5 | 6 | 7 |
| 6 | Even if it would put me in physical distress, I would take a job to help my community | 1 | 2 | 3 | 4 | 5 | 6 | 7 |
| 7 | To help others, I would work a job with a risk of death | 1 | 2 | 3 | 4 | 5 | 6 | 7 |
| 8 | I would tell my company if I saw a coworker drinking on the job, even if I thought they would assault me | 1 | 2 | 3 | 4 | 5 | 6 | 7 |
| 9 | I would tell my company if I saw a coworker doing drugs on the job, even if I thought they would physically attack me | 1 | 2 | 3 | 4 | 5 | 6 | 7 |
| 10 | I would report a coworker committing fraud, even if I thought they might try to hurt me | 1 | 2 | 3 | 4 | 5 | 6 | 7 |
| 11 | I would report a coworker for stealing, even if I thought they would try to fight me | 1 | 2 | 3 | 4 | 5 | 6 | 7 |
| 12 | Even if I felt it was dangerous, I would work a job to provide for my family | 1 | 2 | 3 | 4 | 5 | 6 | 7 |
| 13 | I would work a physically taxing job to provide for my family, even if I knew it could cause health problems | 1 | 2 | 3 | 4 | 5 | 6 | 7 |
| 14 | I would work an unsafe job to provide for my family | 1 | 2 | 3 | 4 | 5 | 6 | 7 |
| 15 | Even if a job would cause a repetitive injury, I would work it to provide for those I care about | 1 | 2 | 3 | 4 | 5 | 6 | 7 |
| 16 | Even if I knew a job would cause long-term injury, I would work a job to provide for my family | 1 | 2 | 3 | 4 | 5 | 6 | 7 |
| 17 | I would take a job in a dangerous location to provide for those that I care about | 1 | 2 | 3 | 4 | 5 | 6 | 7 |
| 18 | I would take a physical risk at work in order to protect others | 1 | 2 | 3 | 4 | 5 | 6 | 7 |
| 19 | If I thought others’ lives were at risk at work, I would risk my life to protect them | 1 | 2 | 3 | 4 | 5 | 6 | 7 |
| 20 | I would put myself in harm’s way to protect my coworkers | 1 | 2 | 3 | 4 | 5 | 6 | 7 |
| 21 | If I thought someone was about to be greatly injured at my workplace, I would throw myself in the line of danger to save them | 1 | 2 | 3 | 4 | 5 | 6 | 7 |
| 22 | I would risk my life at work to protect others | 1 | 2 | 3 | 4 | 5 | 6 | 7 |
| 23 | If an immediate danger arose at my job, I would sacriﬁce my life to save someone else | 1 | 2 | 3 | 4 | 5 | 6 | 7 |
| 24 | I would address an upset customer, even if they may physically  hurt me | 1 | 2 | 3 | 4 | 5 | 6 | 7 |
| 25 | I would reprimand a rude employee, even if I thought it might put  me at physical risk | 1 | 2 | 3 | 4 | 5 | 6 | 7 |
| 26 | I would try to calm an angry employee, even if I thought they would physically ﬁght me for it | 1 | 2 | 3 | 4 | 5 | 6 | 7 |
| 27 | Even if I had large concerns about my physical safety, I would address a customer that was causing a disruption | 1 | 2 | 3 | 4 | 5 | 6 | 7 |
| 28 | I would confront an aggressive employee, even if they might attack me | 1 | 2 | 3 | 4 | 5 | 6 | 7 |
| 29 | I would try to calm an angry customer, even if they might attack me | 1 | 2 | 3 | 4 | 5 | 6 | 7 |
| 30 | I would confront a problem employee, even if it would put me in harm’s way | 1 | 2 | 3 | 4 | 5 | 6 | 7 |

**The Courage Measure**

**Courage is defined as persistence or perseverance despite having fear. It takes courage to engage and persist in a terrifying activity. By definition, fear is necessary for someone to display courage. Please carefully read each statement and rate how often you would or do behave in that way.**

| **Number** | **Item** | **extremely disagreement** |  |  |  |  |  | **extremely agreement** |
| --- | --- | --- | --- | --- | --- | --- | --- | --- |
| 1 | I tend to face my fears. | 1 | 2 | 3 | 4 | 5 | 6 | 7 |
| 2 | If the thought of something makes me anxious, I usually will avoid it a. | 1 | 2 | 3 | 4 | 5 | 6 | 7 |
| 3 | Even if I feel terrified, I will stay in that situation until I have done what I need to do. | 1 | 2 | 3 | 4 | 5 | 6 | 7 |
| 4 | If something scares me, I try to get away from it a. | 1 | 2 | 3 | 4 | 5 | 6 | 7 |
| 5 | Other people describe me as courageous. | 1 | 2 | 3 | 4 | 5 | 6 | 7 |
| 6 | I would describe my self as ‘‘chicken’’ a. | 1 | 2 | 3 | 4 | 5 | 6 | 7 |
| 7 | I will do things even though they seem to be dangerous. | 1 | 2 | 3 | 4 | 5 | 6 | 7 |
| 8 | I act in a courageous way. | 1 | 2 | 3 | 4 | 5 | 6 | 7 |
| 9 | If I am worried or anxious about something, I will do or face it anyway. | 1 | 2 | 3 | 4 | 5 | 6 | 7 |
| 10 | If there is an important reason to face something that scares me, I will face it. | 1 | 2 | 3 | 4 | 5 | 6 | 7 |
| 11 | Even if something scares me, I will not back down. | 1 | 2 | 3 | 4 | 5 | 6 | 7 |
| 12 | I will not face something I fear, even if avoiding it will have a negative outcome for me a. | 1 | 2 | 3 | 4 | 5 | 6 | 7 |

a : refers to reverse scored items.

**The Positive and Negative Affect Scale**

**This scale consists of a number of words that describe different feelings and emotions. Read each item and then mark the appropriate answer in the space next to that word. Indicate to what extent.**

| **Number** | **Item** | **Very slightly** |  |  |  | **Extremely** |
| --- | --- | --- | --- | --- | --- | --- |
| 1 | Enthusiastic | 1 | 2 | 3 | 4 | 5 |
| 2 | Interested | 1 | 2 | 3 | 4 | 5 |
| 3 | Determined | 1 | 2 | 3 | 4 | 5 |
| 4 | Excited | 1 | 2 | 3 | 4 | 5 |
| 5 | Inspired | 1 | 2 | 3 | 4 | 5 |
| 6 | Alert | 1 | 2 | 3 | 4 | 5 |
| 7 | Active | 1 | 2 | 3 | 4 | 5 |
| 8 | Strong | 1 | 2 | 3 | 4 | 5 |
| 9 | Proud | 1 | 2 | 3 | 4 | 5 |
| 10 | Attentive | 1 | 2 | 3 | 4 | 5 |
| 11 | Scared | 1 | 2 | 3 | 4 | 5 |
| 12 | Afraid | 1 | 2 | 3 | 4 | 5 |
| 13 | Upset | 1 | 2 | 3 | 4 | 5 |
| 14 | Distressed | 1 | 2 | 3 | 4 | 5 |
| 15 | Jittery | 1 | 2 | 3 | 4 | 5 |
| 16 | Nervous | 1 | 2 | 3 | 4 | 5 |
| 17 | Ashamed | 1 | 2 | 3 | 4 | 5 |
| 18 | Guilty | 1 | 2 | 3 | 4 | 5 |
| 19 | Irritable | 1 | 2 | 3 | 4 | 5 |
| 20 | Hostile | 1 | 2 | 3 | 4 | 5 |
